# Supplementary material for: Vitamin C Levels in Different Organs of Bat Species from Different Food Groups
Source: MDPI journal article supplement (doi:10.3390/life12122121), 2022-12-15
Supplement: s1 [file s1]

Supplementary Table S1. Location and coordinates of each sample collection site in Southern Brazil.

| Bat Species        | Food Group    | n  | Location (City - State)  | Coordinates                 |
|--------------------|---------------|----|--------------------------|-----------------------------|
| <i>G. soricina</i> | Nectarivorous | 10 | Dom Pedro Alcântara - RS | 29°24'22.35"S 49°51'4.56''W |
| <i>S. lilium</i>   | Frugivorous   | 10 | Dom Pedro Alcântara - RS | 29°24'22.35"S 49°51'4.56''W |
| <i>M. molossus</i> | Insectivorous | 10 | Treviso - SC             | 28°30'47.52"S 49°27'26.6" W |
| <i>D. rotundus</i> | Hematophagous | 9  | Criciúma - SC            | 28°41'27.7"S 49°25'50.6"W   |
